# Supplementary material for: Myotube elasticity of an amyotrophic lateral sclerosis mouse model
Source: PubMed Central journal article supplement (PMC5897453; doi:10.1038/s41598-018-24027-5), 2018-04-12
Supplement: 41598_2018_24027_MOESM1_ESM.pdf [file 41598_2018_24027_MOESM1_ESM.pdf]

# Myotube elasticity of an amyotrophic lateral sclerosis mouse model

Béla Varga, Marta Martin-Fernandez, Cécile Hilaire, Ana Sanchez-Vicente, Julie Areias, Céline Salsac, Frederic J.G. Cuisinier, Cedric Raoul, Frédérique Scamps and Csilla Gergely

## Supplementary Information

### 1. Genotyping

Genotyping was carried out on DNA isolated from tail clips. A multiplex PCR with the following primers: SOD13 Forward: 5'-TTCTGTTCCCTTCTCACTGT-3'; SOD13 Reverse: 5'-TCCCCTTTGGCACTTGTATT-3'; SOD15 Forward: 5'-TGTTGGGAGGAGGTAGTGATTA-3'. SOD15 Reverse: 5'-AGCAGAGTTGTGTTAGTTTTAG-3'.

### 2. Quantification of gene expression

Myoblasts were seeded at the density of 10,000 cells per cm<sup>2</sup> in 60 mm collagen coated plates (280,000 myoblasts per plate). Total mRNA was extracted with the RNeasy Mini Kit (Qiagen) as described by Pieraut *et al.*<sup>1</sup>. The eluted mRNA was quantified by spectrophotometry (Nanodrop). Following gDNA wipe out, RT was performed with Quantitect RT kit (Qiagen). The primer sequences, designed with Primer-BLAST at NCBI, are listed in

Table 1.

**Table 1. Primers.** Name, sequence, amplicon length (Al) and melting point (Tm) of primers used for qRT-PCR are listed below.

| Target genes                                      | Sequences                                            | Al  | Tm |
|---------------------------------------------------|------------------------------------------------------|-----|----|
| <i>Acta1</i><br>(Actin skeletal muscle variant 1) | F: AAGTCCTGCAAGTGAACAAGC<br>R: TTCGTCGCACATGGTGTCTA  | 80  | 59 |
| <i>Acta2</i><br>(Actin skeletal muscle variant 2) | F: ACGTGAAGCCTCACTTCCTA<br>R: TGTCTAGTTTCTGCTGCTCTG  | 64  | 58 |
| <i>Myh1</i><br>(adult Myosin Heavy Chain IIx)     | F: TTCAAGTTTGGACCCACGGT<br>R: AGTGAGAGAGCCTGCCTTTA   | 54  | 59 |
| <i>Myh2</i><br>(adult Myosin Heavy Chain IIa)     | F: TCCAAGTCCGCAAGATCCA<br>R: GCGCATGACCAAAGGTTTCA    | 193 | 59 |
| <i>Myh3</i><br>(embryonic Myosin Heavy Chain)     | F: TGTTGAGATTGCAGGATCTGG<br>R: TGCTGGGCTTTCCTGAACTT  | 121 | 59 |
| <i>Myh4</i><br>(adult Myosin Heavy Chain IIb)     | F: TTCCGTAAGATCCAGCACGA<br>R: TCCTGTCACCTCTCAACAGA   | 151 | 58 |
| <i>Myh7</i><br>(adult Myosin Heavy Chain-beta)    | F: TGAGCATTCTCCTGCTGTTTC<br>R: TGAGCCTTGGATTCTCAAACG | 138 | 58 |

|                                                      |                                                     |     |    |
|------------------------------------------------------|-----------------------------------------------------|-----|----|
| <i>Myh8</i><br>(neonatal Myosin Heavy Chain)         | F: ACAATCCAATGCCAACCTGG<br>R: TCCTTCCTCTGCAAGATGTGT | 156 | 59 |
| <i>hSOD1</i><br>(human superoxide dismutase 1)       | F: ACAAAGATGGTGTGGCCGAT<br>R: AACGACTTCCAGCGTTTCCT  | 162 | 59 |
| <i>Polr2j</i><br>(polymerase (RNA) II polypeptide J) | F: ACCACACTCTGGGGAACATC<br>R: CTCGCTGATGAGGTCTGTGA  | 160 | 59 |

Quantitative RT-PCR (qRT-PCR) was performed with 100 ng of total cDNA using SYBR Green (Qiagen) and the LightCycler system (Roche Diagnostics), after initial activation for 15 min at 95°C, 45 cycles of 94°C for 15 s, 60°C for 20 s and 72°C for 35 s were carried out. After PCR amplification, a melting curve analysis was carried out to ensure PCR specificity. Polymerase (RNA) II polypeptide J (Polr2J) levels were used to normalize the amounts of cDNA.  $\Delta\text{Ct}$  was calculated as the difference between the Ct values, determined with the equation  $2^{-\Delta\text{Ct}}$ .

### 3. Additional figures

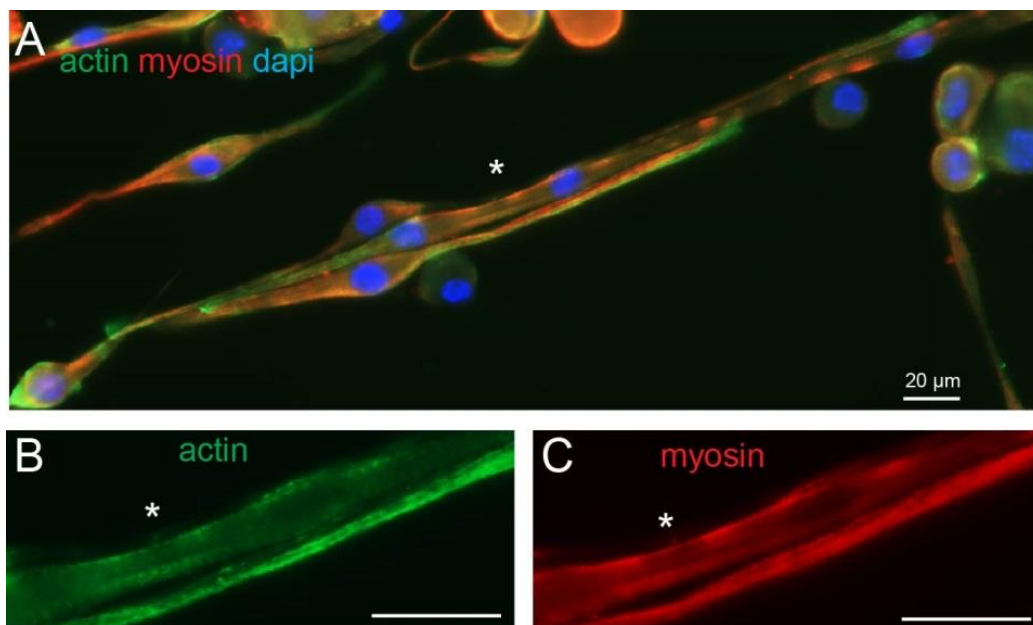

**Figure S1. Maturation of wildtype myotubes.** A: Immunofluorescence image of wildtype myotubes at 7 DIV with actin (green), myosin (red) and nucleus (blue) staining. B and C represent an enlargement of the marked area showing a more ordered actin (B), but a less ordered myosin distribution (C) along the myotube.

### References

1. Pieraut, S. *et al.* An Autocrine Neuronal Interleukin-6 Loop Mediates Chloride Accumulation and NKCC1 Phosphorylation in Axotomized Sensory Neurons. *J. Neurosci.* **31**, 13516–13526 (2011).
